# Supplementary material for: Rapid osteogenic differentiation of mesenchymal stem cells on hydroxyapatite nanocrystal clusters-oriented nanotopography
Source: Royal Society of Chemistry journal article supplement (doi:10.1039/c4ra10027a), 2014-01-01
Supplement: c4ra10027a1.pdf [file c4ra10027a1.pdf]

Electronic Supplementary Information

## Rapid Osteogenic Differentiation of Mesenchymal Stem Cells on Hydroxyapatite Nanocrystal Clusters-Oriented Nanotopography

Ying Chen, Zihui Sun, Yanyan Li, and Youliang Hong\*

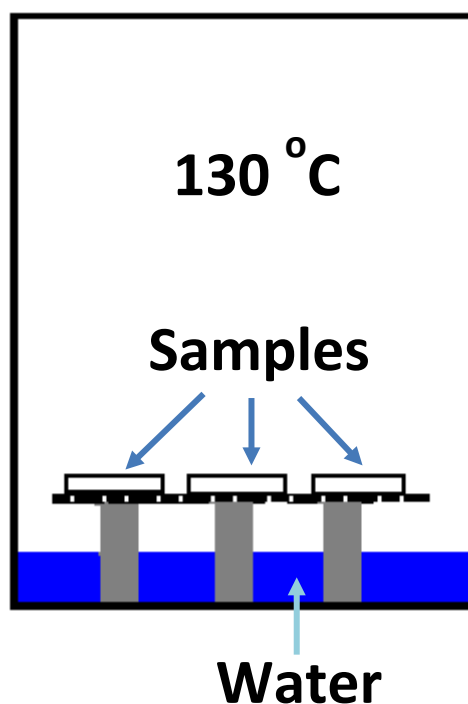

**Fig. S1.** The schematic illustration of the device for high temperature water-vapor treatment. In the practical process, the samples (the as-sprayed HAP slices) were placed on a porous teflon plate, which is supported to isolate from water, and then the device was heated under 130 °C for 2 h.

**Table S1.** Detailed information about the primer sequences used for RT-PCR.

| Symbol | Accession No.  | Primers |                            |
|--------|----------------|---------|----------------------------|
| GAPDH  | NM_001082253.1 | Forward | 5'-ATGGGGAAGGTGAAGGTCG-3'  |
|        |                | Reverse | 5'-TAAAAGCAGCCCTGGTGACC-3' |
| Cbfa-1 | AY598934       | Forward | 5'-TCTGGCCTTCCACTCTCAGT-3' |
|        |                | Reverse | 5'-GACTGGCGGGGTGTAAGTAA-3' |
| BMP-2  | NM_001082650   | Forward | 5'-CTTGGAGGAGAAGCAAGGTG-3' |
|        |                | Reverse | 5'-AGTTACGAGCAAAGGCCTGA-3' |
| Col-I  | Z74615         | Forward | 5'-CGTGGTGACAAGGGTGAGAC-3' |
|        |                | Reverse | 5'-TAGGTGATGTTCTGGGAGGC-3' |
| OPN    | NM_001082194   | Forward | 5'-CGCAGAATGCTATGTCCTCA-3' |
|        |                | Reverse | 5'-GTGGTCATCGTCCTCATCCT-3' |
| BSP    | XM_008267617.1 | Forward | 5'-CTGGGGCCATAGAAAACAAA-3' |
|        |                | Reverse | 5'-GTGACGCTCTCTCCTTCACC-3' |
| OCN    | XM_002715383.2 | Forward | 5'-CAGCCTTCGTGTCCAAGAG-3'  |
|        |                | Reverse | 5'-TTTATTGGGAGCAGCTGGAG-3' |

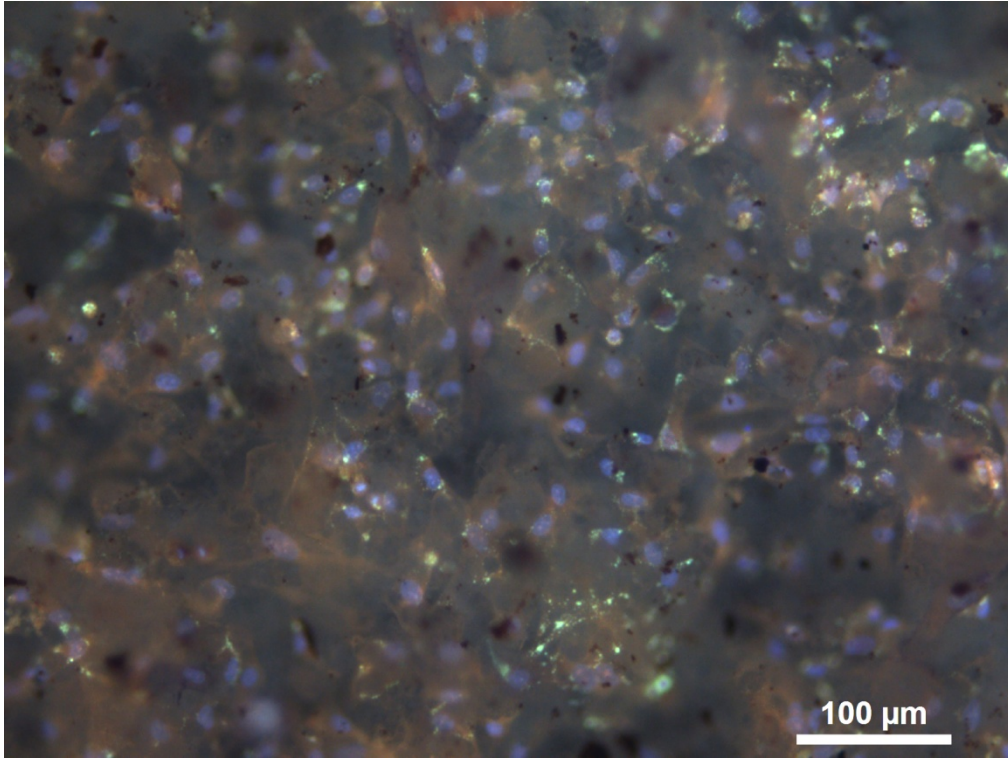

**Fig. S2.** The magnified ALP staining of MSCs cultured on the HAP nanocrystal clusters for 4 days.

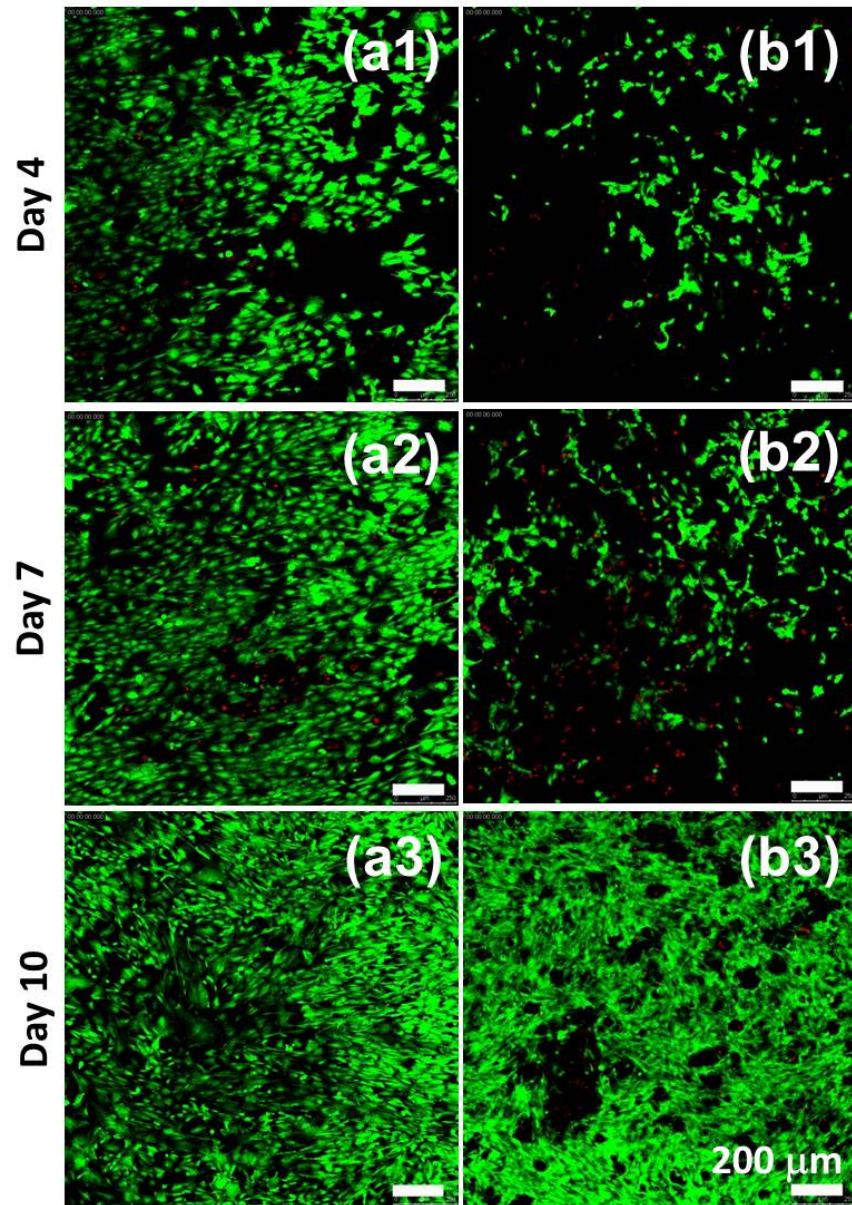

**Fig. S3.** Live-dead staining of MSCs cultured on (a1-a3) the smooth HAP surface over time and (b1-b3) the HAP nanocrystal-clusters.
